# Supplementary material for: Enhanced environmental adaptability of sandwich-like MoS2/Ag/WC nanomultilayer films via Ag nanoparticle diffusion-dominated defect repair
Source: Royal Society of Chemistry journal article supplement (doi:10.1039/d4mh00867g), 2024-01-01
Supplement: d4mh00867g1.pdf [file d4mh00867g1.pdf]

## Supplementary Information

**Enhanced environmental adaptability of sandwich-like MoS<sub>2</sub>/Ag/WC  
nanomultilayer film via Ag nanoparticle diffusion-dominated defect repair**

Min Yang,<sup>a,b</sup> Xin Fan,<sup>a,b</sup> Siming Ren,<sup>\*a</sup> and Liping Wang<sup>\*a</sup>

*<sup>a</sup> Key Laboratory of Advanced Marine Materials, Ningbo Institute of  
Materials Technology and Engineering, Chinese Academy of Sciences, Ningbo  
315201, China.*

*<sup>b</sup> University of Chinese Academy of Sciences, Beijing 100049, China.*

\*Corresponding Authors:

Email: [rensiming@nimte.ac.cn](mailto:rensiming@nimte.ac.cn) (Siming Ren); [wangliping@nimte.ac.cn](mailto:wangliping@nimte.ac.cn)

(Liping Wang)

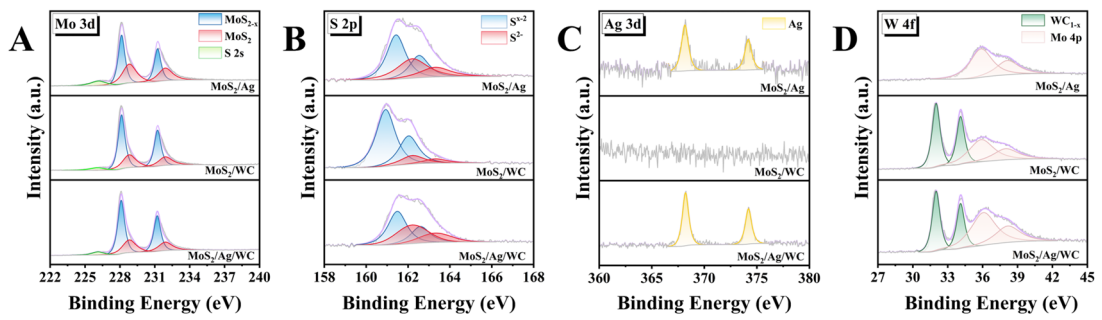

**Fig. S1** Chemical bonding analysis of sandwich-like MoS<sub>2</sub>/Ag/WC nanomultilayer film and reference films. (A) Mo 3d. (B) S 2p. (C) Ag 3d. (D) W 4f.

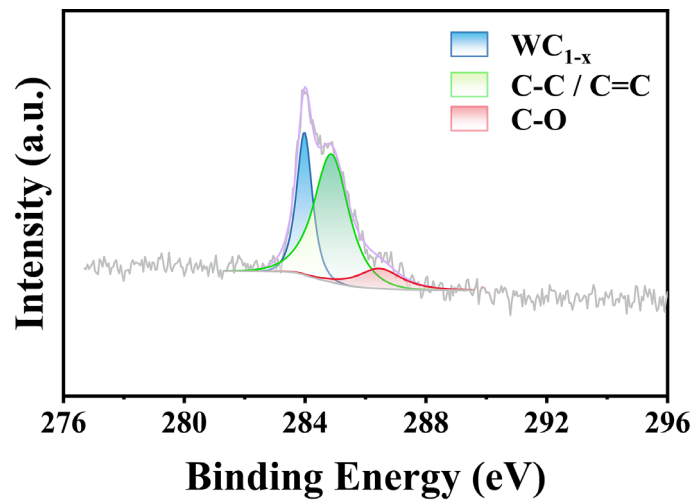

**Fig. S2** XPS C 1s spectrum of sandwich-like MoS<sub>2</sub>/Ag/WC nanomultilayer film.

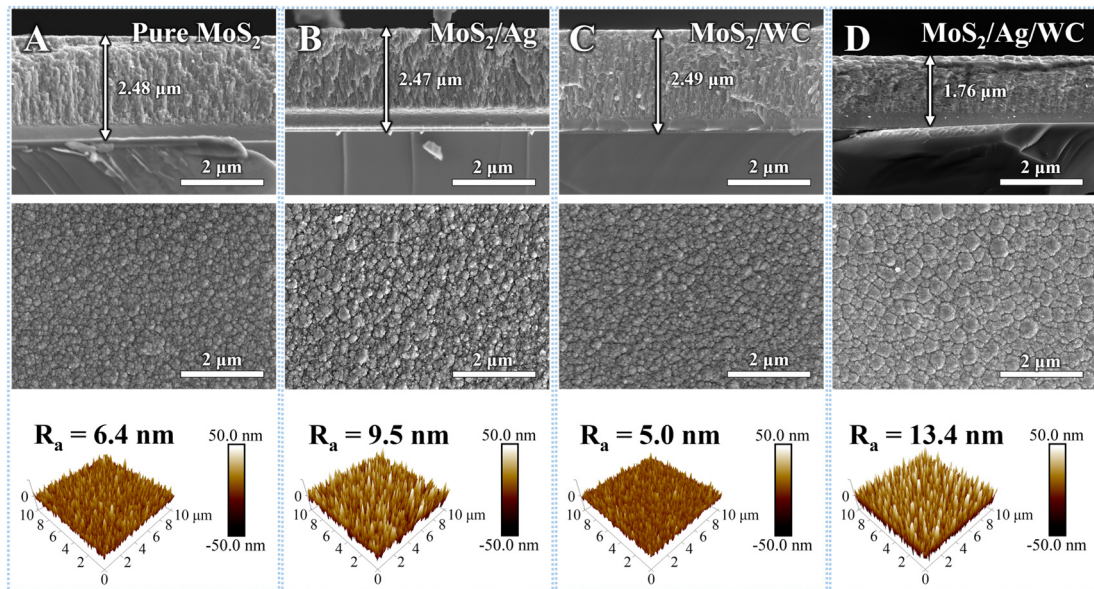

**Fig. S3** Morphologies and structures of sandwich-like MoS<sub>2</sub>/Ag/WC nanomultilayer film and reference films. (A-D) Cross-section, surface SEM images and SPM images illustrating structures and topographic variations of sandwich-like MoS<sub>2</sub>/Ag/WC nanomultilayer film and reference films.

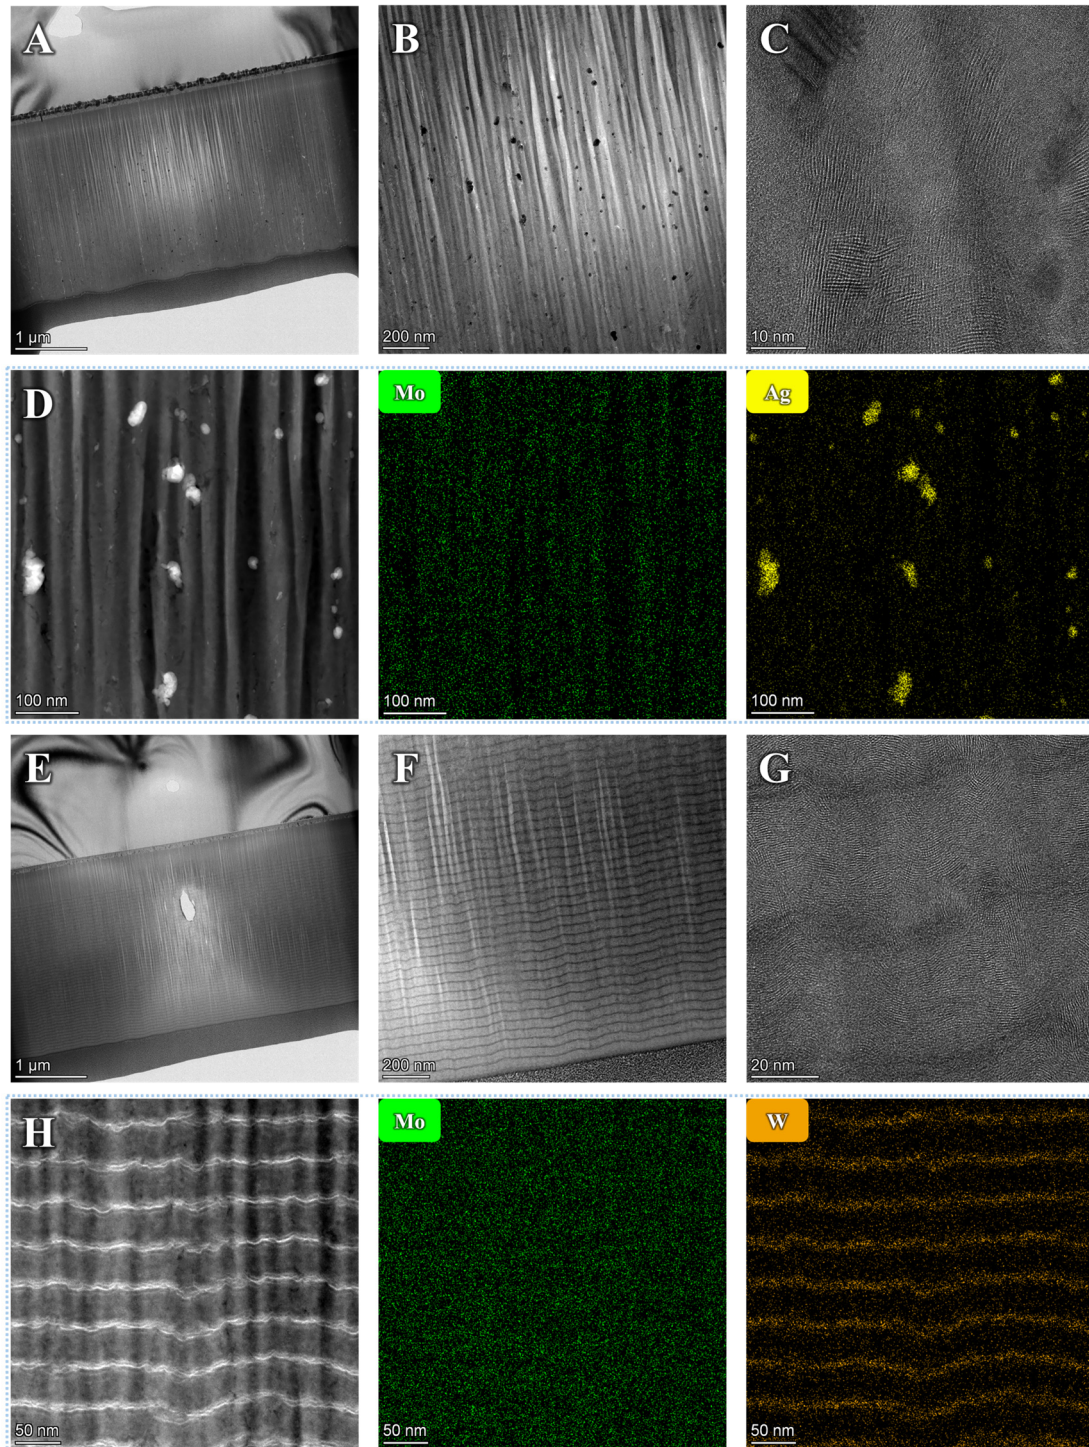

**Fig. S4** Structural characterization and interface analysis of MoS<sub>2</sub>/Ag composite film and MoS<sub>2</sub>/WC nanomultilayer film. (A-B) Low and high magnification TEM images showing cross-sectional view of MoS<sub>2</sub>/Ag composite film, respectively. (C) Detailed HRTEM image exhibits the randomly oriented MoS<sub>2</sub>(002) planes and Ag NPs. (D) STEM-HAADF micrograph and corresponding EDS maps (Mo, Ag) of MoS<sub>2</sub>/Ag composite film. (E-F) Low and high magnification TEM images showing cross-sectional view of MoS<sub>2</sub>/WC nanomultilayer film, respectively. (G) Detailed HRTEM image exhibits the alternating growth of MoS<sub>2</sub>(002) layers and amorphous WC layers. (H) STEM-HAADF micrograph and corresponding EDS maps (Mo, W) of MoS<sub>2</sub>/WC nanomultilayer film.







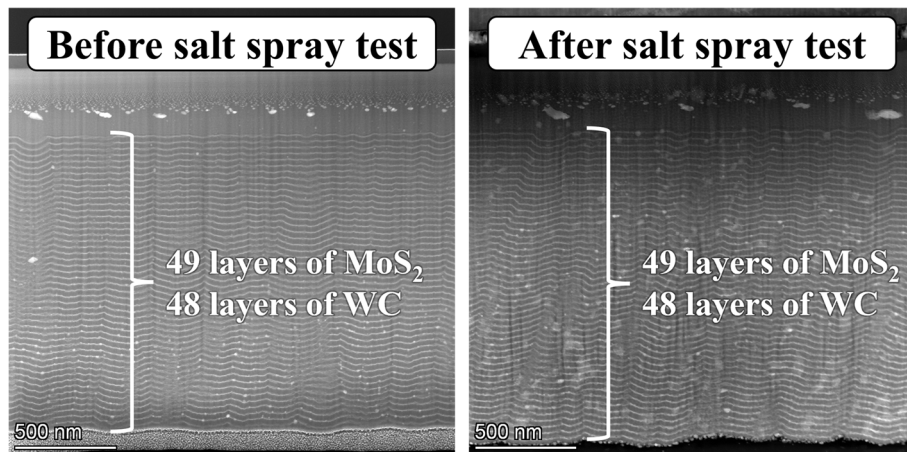

**Fig. S7** Modulation period counting of sandwich-like MoS<sub>2</sub>/Ag/WC nanomultilayer film before and after salt spray tests of 21 days.

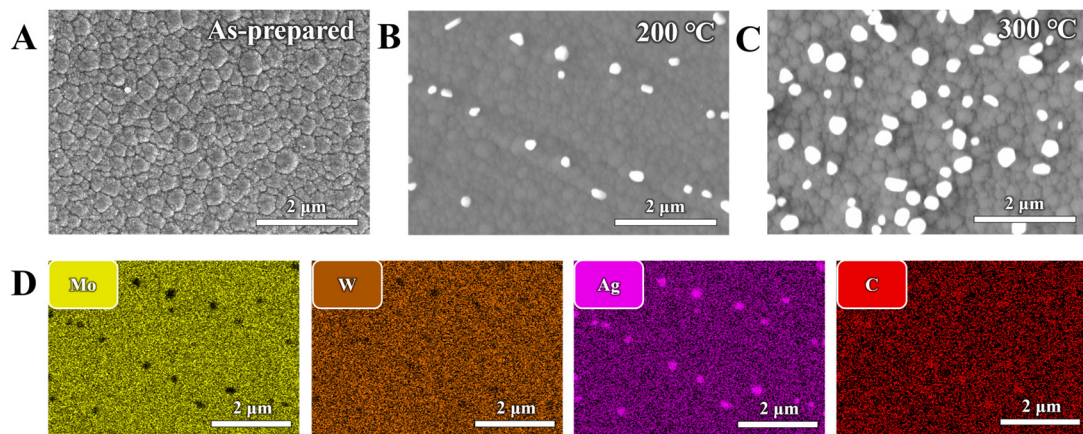

**Fig. S8** Ag diffusion behavior under vacuum annealing of elevated temperatures. (A-C) SEM images of as-prepared (A), 200 °C (B) and 300 °C (C) vacuum annealing surface of the sandwich-like MoS<sub>2</sub>/Ag/WC nanomultilayer films. (D) Corresponding EDS maps (Mo, W, Ag, C) of (B).

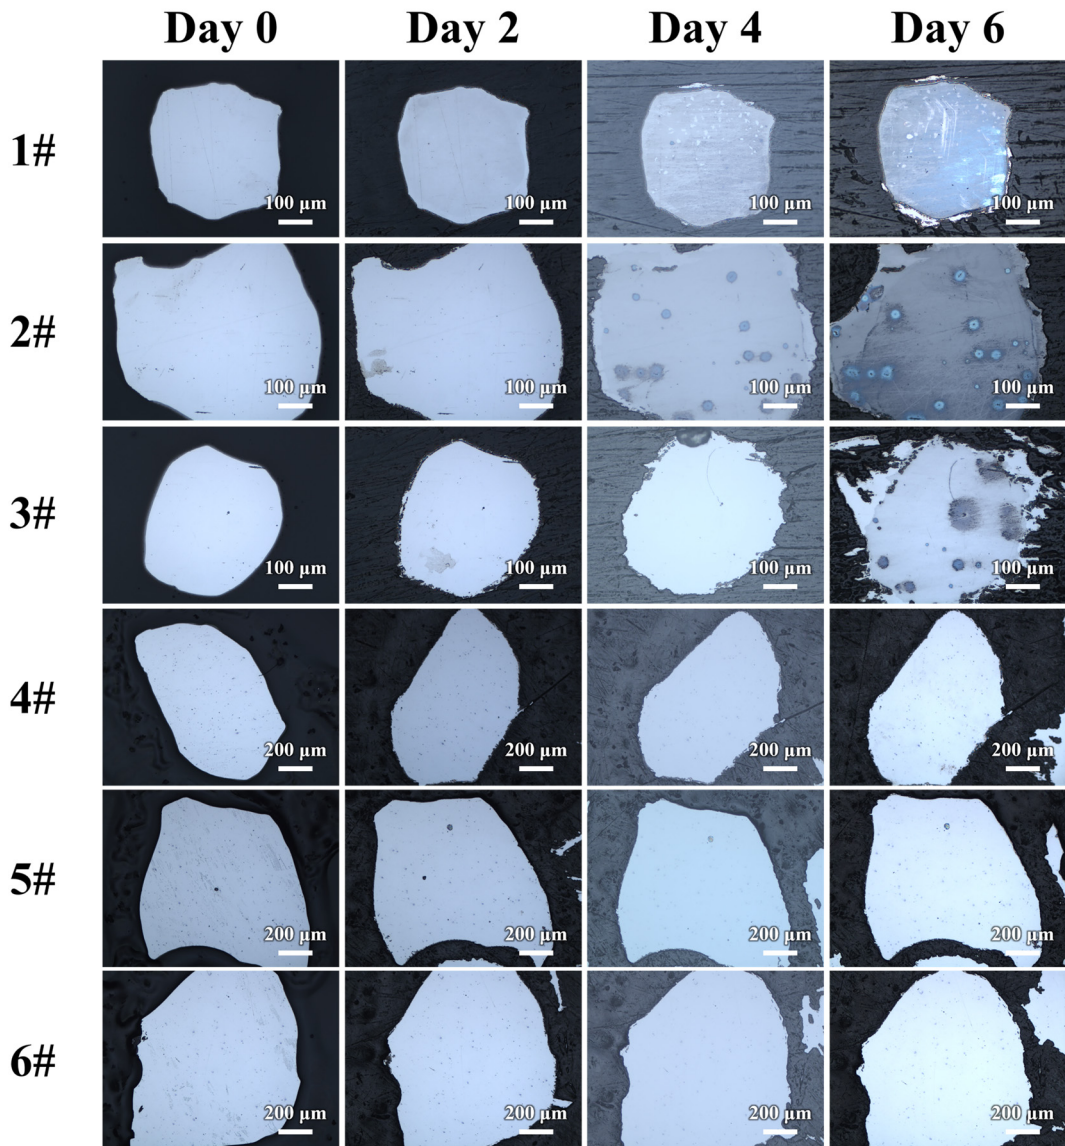

**Fig. S9** Optical images of the sandwich-like MoS<sub>2</sub>/Ag/WC nanomultilayer films for as-prepared state (1#~3#) and 36 months air exposure (4#~6#) after 0, 2, 4, 6 days of salt spray.



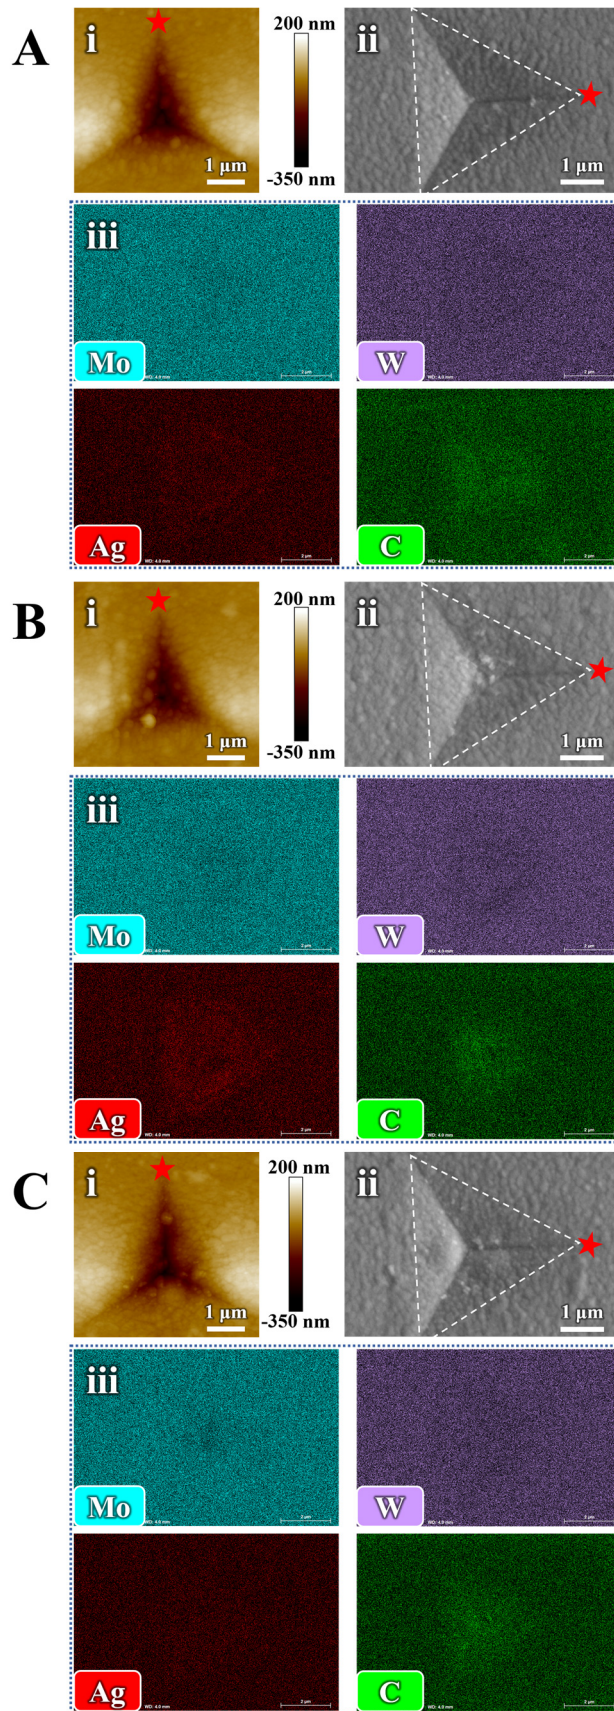

**Fig. S10** Diffusion behavior of three random nanoindentations for the sandwich-like MoS<sub>2</sub>/Ag/WC nanomultilayer films. (A-C) Topographical images (i), surface potential distributions (ii), SEM images (iii) and corresponding EDS Mo, W, Ag and C maps (iv) on nanoindentations after 6 days of salt spray, the five-pointed star indicates the identical position of each indentation.

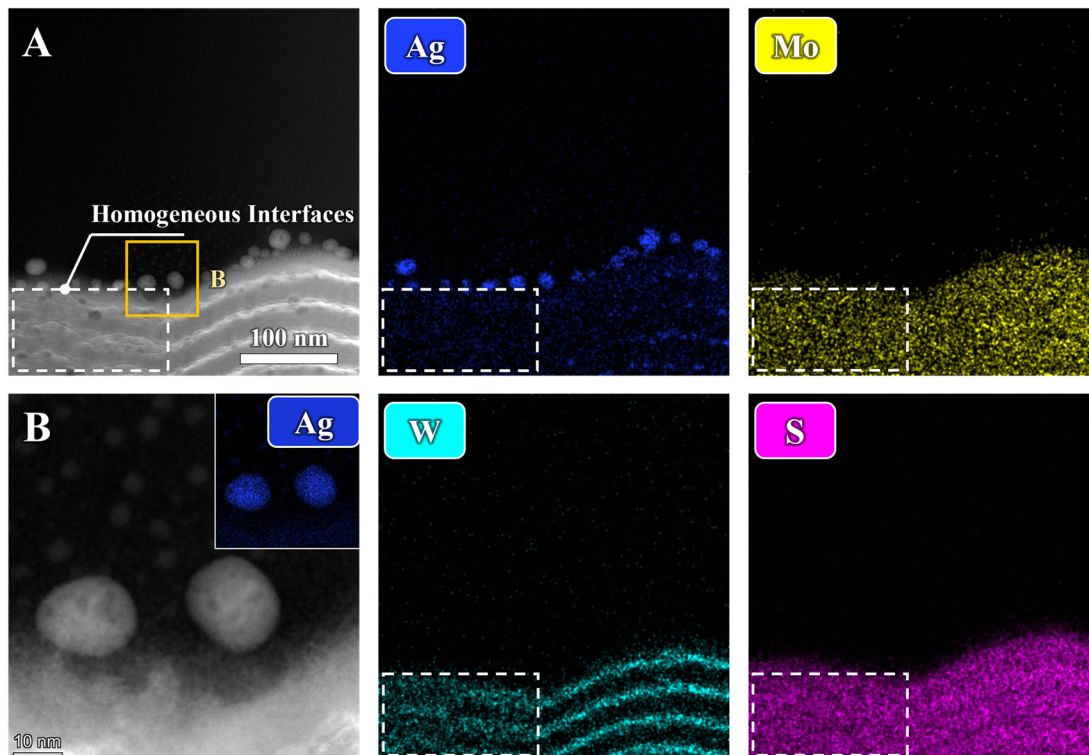

**Fig. S11** Cross-sectional composition and morphology of the sandwich-like  $\text{MoS}_2/\text{Ag}/\text{WC}$  nanomultilayer film after 21 days of salt spray plus 18 months of air exposure. (A) The STEM-HAADF image and corresponding EDS maps (Mo, W, Ag, S) reveal a mixed interface marked by white dash frame after long-term corrosion test. (B) Enlarged view and corresponding EDS Ag map illustrating the particle size and structure on the top surface.

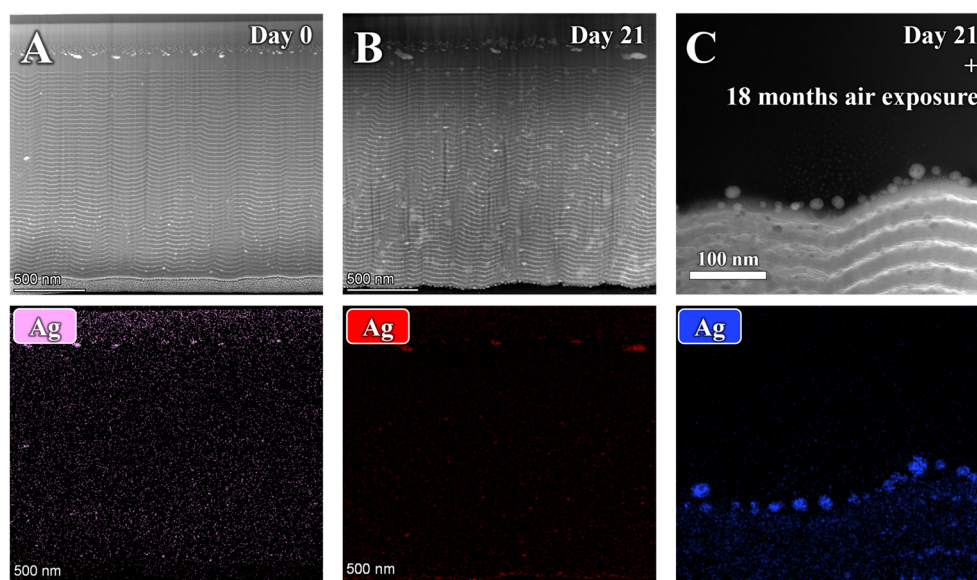

**Fig. S12** Ag NPs diffusion behaviors of the sandwich-like  $\text{MoS}_2/\text{Ag}/\text{WC}$  nanomultilayer films over time. Cross-sectional TEM micrographs and corresponding EDS Ag maps of the sandwich-like  $\text{MoS}_2/\text{Ag}/\text{WC}$  nanomultilayer film before (A) and after (B) 21 days of salt spray, and (C) 18 months air exposure after 21 days salt spray.



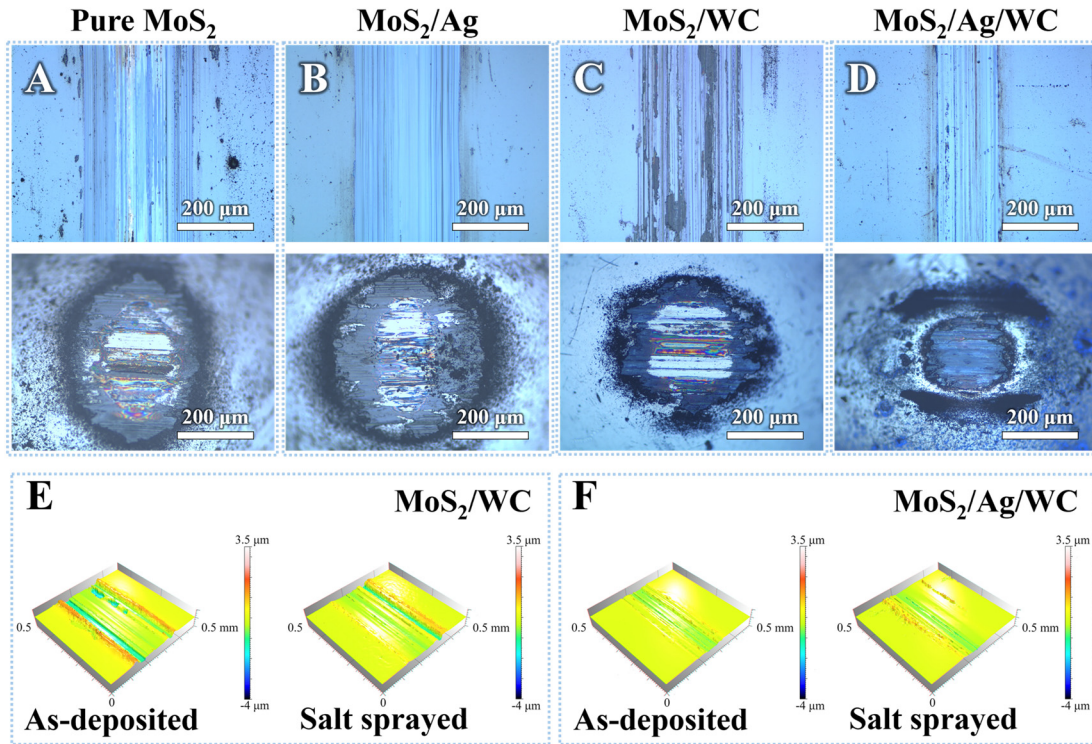

**Fig. S13** Characterizations of rubbing surface for the sandwich-like MoS<sub>2</sub>/Ag/WC nanomultilayer film and reference films before salt spray tests. (A-D) Optical images on film wear tracks and ball wear scars. (E-F) 3D morphologies of film wear tracks obtained from MoS<sub>2</sub>/WC and MoS<sub>2</sub>/Ag/WC nanomultilayer films before and after salt spray tests of 21 days.

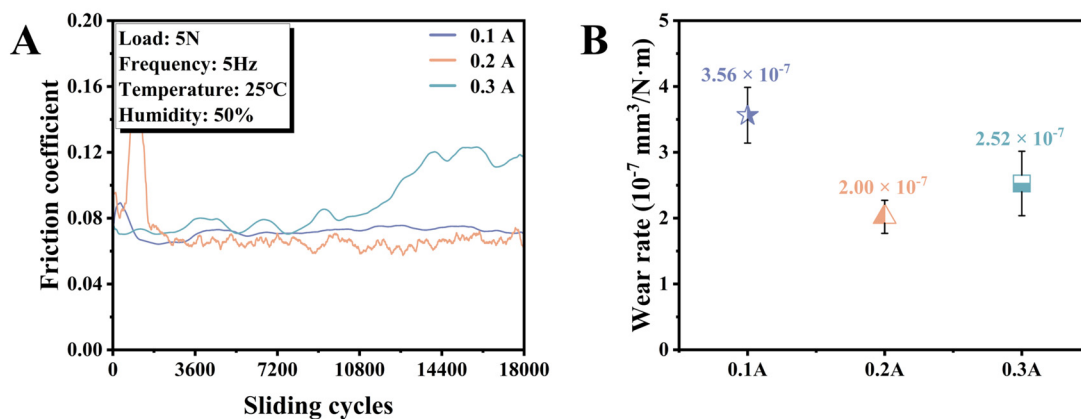

**Fig. S14** Tribological performance of the sandwich-like MoS<sub>2</sub>/Ag/WC nanomultilayer films with varying Ag target currents. Friction curves (A) and wear rates (B) of the sandwich-like MoS<sub>2</sub>/Ag/WC nanomultilayer films (Ag target current: 0.1 A, 0.2 A and 0.3 A).

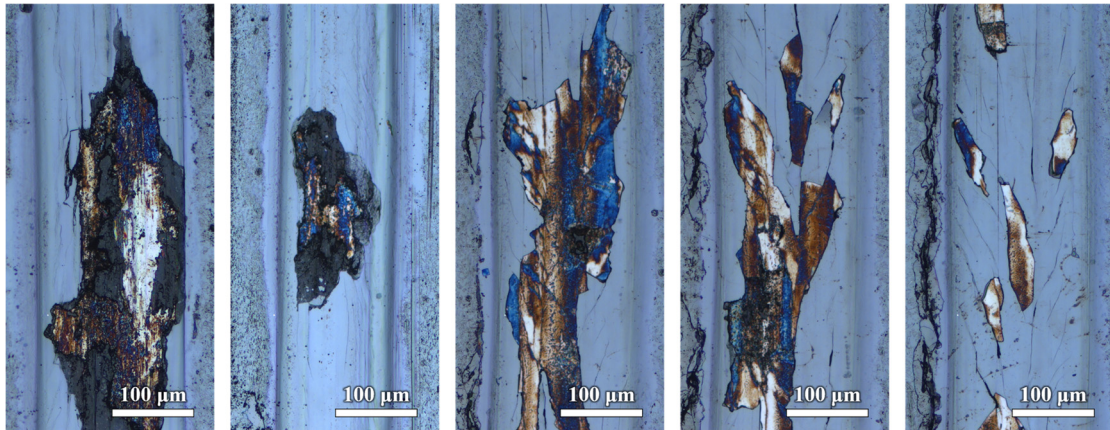

**Fig. S15** Optical images on repeated film wear tracks of five different film wear tracks for the MoS<sub>2</sub>/WC nanolayered films after salt spray test of 21 days.

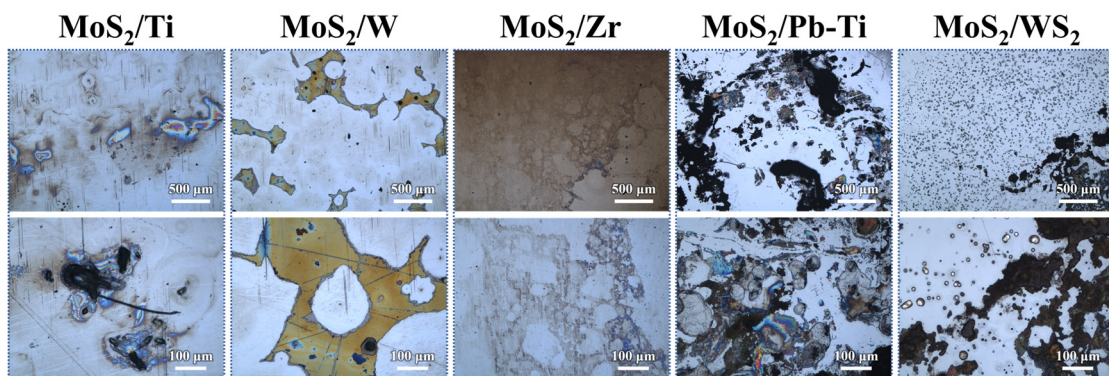

**Fig. S16** Optical photographs of MoS<sub>2</sub>-based films, including MoS<sub>2</sub>/Ti, MoS<sub>2</sub>/W, MoS<sub>2</sub>/Zr, MoS<sub>2</sub>/Pb-Ti, and MoS<sub>2</sub>/WS<sub>2</sub>, after 14 days of salt spray testing.

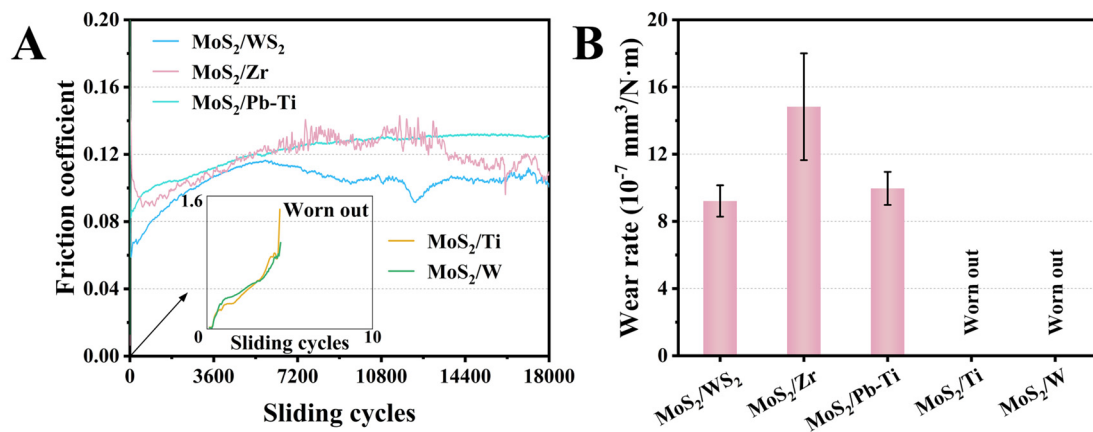

**Fig. S17** Friction curves (A) and average wear rates (B) of reported state-of-art MoS<sub>2</sub>-based (Ti, W, Zr, Pb-Ti, WS<sub>2</sub>) films after 14 days of salt spray.



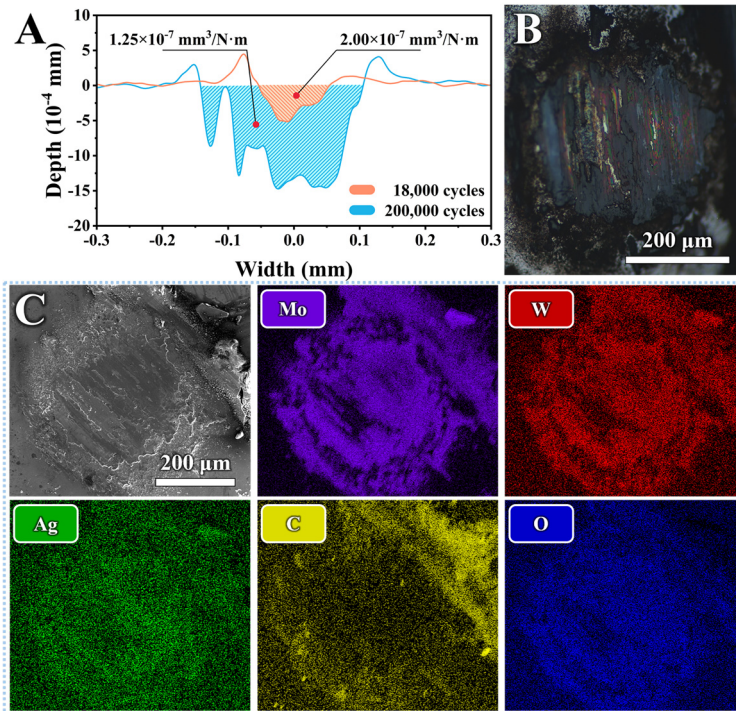

**Fig. S18** Wear behavior and characterization of MoS<sub>2</sub>/Ag/WC nanomultilayer film after long-term tribological test. (A) Cross-sectional profiles showing wear volume before and after long-term tribological tests, with the corresponding calculated wear rate labelled. (B) Optical image of ball wear scar generated by MoS<sub>2</sub>/Ag/WC nanomultilayer film after the long-term tribological test. (C) Corresponding SEM image and EDS maps (Mo, W, Ag, C, O) of the optical image shown in (B).
